# Supplementary material for: Dl-3-n-Butylphthalide Reduced Neuroinflammation by Inhibiting Inflammasome in Microglia in Mice after Middle Cerebral Artery Occlusion
Source: MDPI journal article supplement (doi:10.3390/life12081244), 2022-08-16
Supplement: s1 [file s1]

The data from top to bottom in the table corresponds to the image from left to right.

**Figure S1.**

The Western blot results of NLRP3.

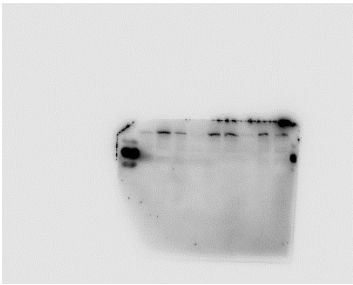

(NLRP3)

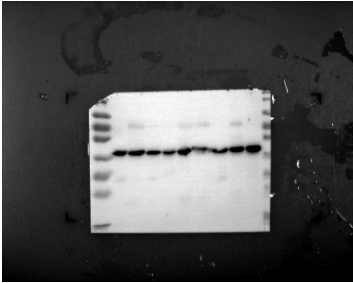

(actin)

| NLRP3 | actin  | ratio                                   | Group |
|-------|--------|-----------------------------------------|-------|
| 31291 | 82434  | 0.379589                                | SHAM  |
| 57909 | 96433  | 0.60051                                 | OIL   |
| 39561 | 67965  | 0.582079                                | NBP   |
| 30454 | 60578  | 0.502724                                | SHAM  |
| 55106 | 94028  | 0.586059                                | OIL   |
| 57804 | 96498  | 0.599018 (An<br>unsuccessful detection) | NBP   |
| 35449 | 72790  | 0.487004                                | SHAM  |
| 53276 | 99016  | 0.538054                                | OIL   |
| 58307 | 126130 | 0.462277                                | NBP   |

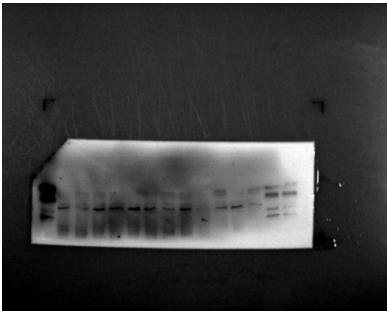

(NLRP3)

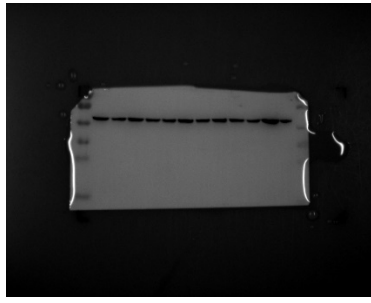

(β-actin)

| NLRP3 | actin | ratio    | Group |
|-------|-------|----------|-------|
| 32432 | 42598 | 0.76135  | OIL   |
| 28506 | 39648 | 0.718977 | OIL   |
| 37931 | 49481 | 0.766577 | OIL   |
| 50738 | 39306 | 1.290846 | OIL   |
| 45475 | 41149 | 1.10513  | OIL   |
| 39750 | 50628 | 0.785139 | OIL   |
| 30616 | 41929 | 0.730187 | NBP   |
| 32391 | 49781 | 0.65067  | NBP   |
| 22964 | 44536 | 0.515628 | NBP   |
| 32066 | 42334 | 0.757453 | NBP   |
| 36231 | 78563 | 0.461171 | NBP   |
| 26267 | 40747 | 0.644636 | NBP   |

The Western blot results of ASC.

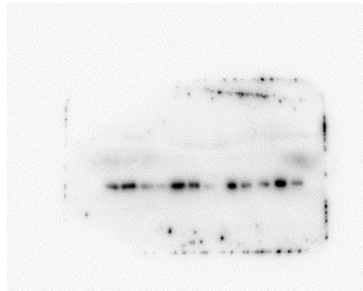

(ASC)

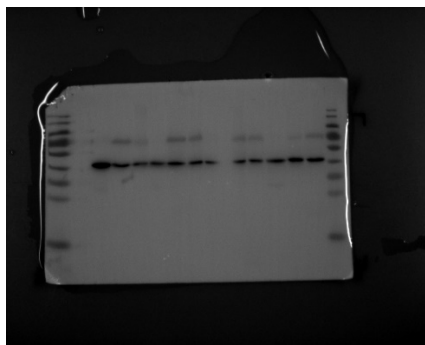

(β-actin)

| ASC   | β-actin | ratio    | group |
|-------|---------|----------|-------|
| 60563 | 99346   | 0.609617 | SHAM  |
| 94195 | 64558   | 1.459076 | OIL   |

|        |       |          |      |
|--------|-------|----------|------|
| 49048  | 54315 | 0.903029 | NBP  |
| 31026  | 57275 | 0.541702 | SHAM |
| 104141 | 66760 | 1.559931 | OIL  |
| 73824  | 56991 | 1.295362 | NBP  |
| 29503  | 37449 | 0.787818 | SHAM |
| 82181  | 42525 | 1.932534 | OIL  |
| 55189  | 51223 | 1.077426 | NBP  |
| 52401  | 59945 | 0.874151 | SHAM |
| 104075 | 65802 | 1.581639 | OIL  |
| 51679  | 65632 | 0.787406 | NBP  |

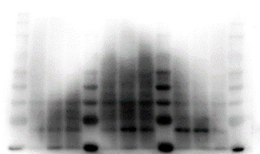

(Photographs of ASC. We used the middle three bands as a schematic diagram, so there was no statistical analysis.)

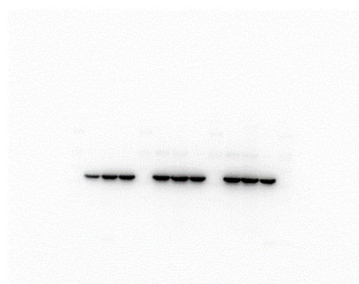

( $\beta$ -actin)

Figure S2

The Western blot results of caspase-1.

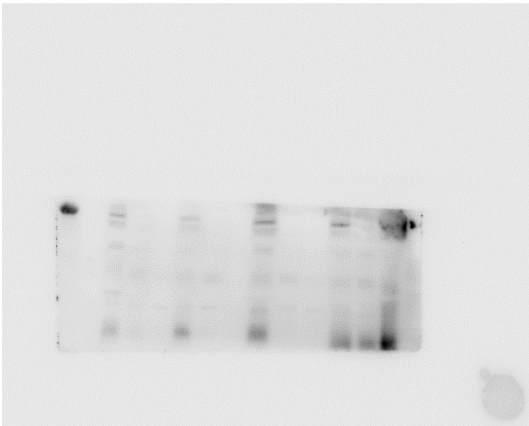

(caspase-1 and cleaved caspase-1)

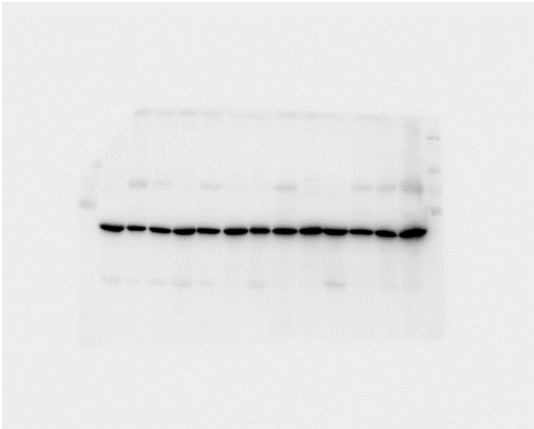

(β-actin)

| CASP1 | β-actin | Ratio1   | Group |
|-------|---------|----------|-------|
| 15263 | 97499   | 0.156545 | SHAM  |
| 27013 | 70225   | 0.384664 | OIL   |
| 18872 | 77812   | 0.242533 | NBP   |
| 16835 | 89528   | 0.188042 | SHAM  |
| 25010 | 88034   | 0.284095 | OIL   |
| 18696 | 108294  | 0.172641 | NBP   |
| 17788 | 85985   | 0.206873 | SHAM  |
| 39385 | 112325  | 0.350634 | OIL   |
| 18653 | 93816   | 0.198825 | NBP   |
| 17524 | 115658  | 0.151516 | SHAM  |
| 34517 | 103691  | 0.332883 | OIL   |
| 26554 | 102721  | 0.258506 | NBP   |
| 68801 | 157540  | 0.436721 | OIL   |

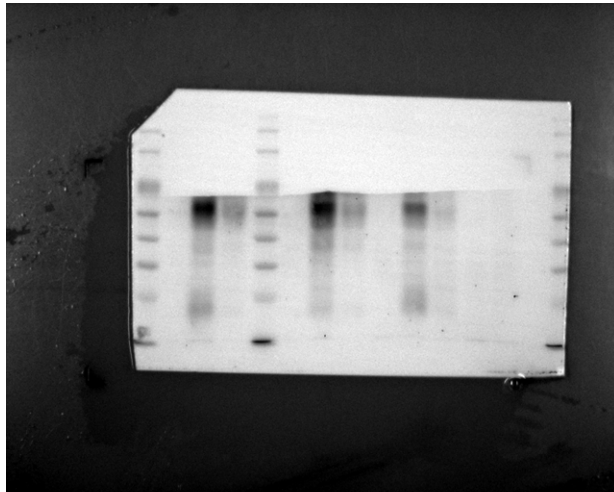

(Photographs of caspase-1 and cleaved caspase-1. We used the left three bands as a schematic diagram, so there was no statistical analysis.)

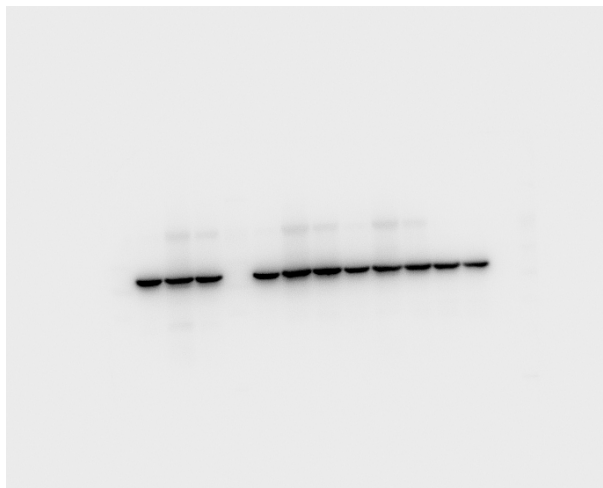

( $\beta$ -actin)

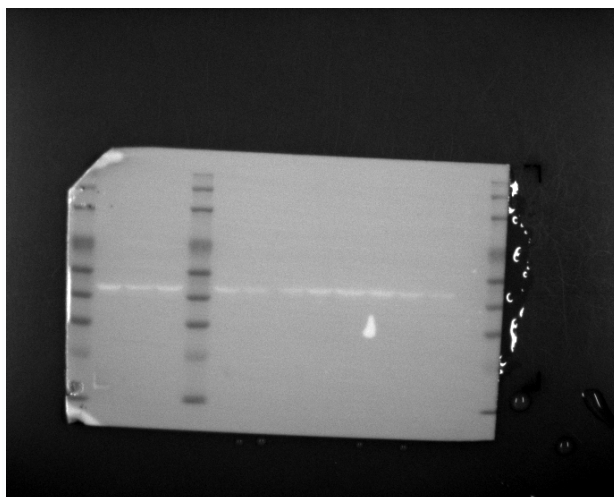

(Bright field images)

Figure S3

The Western blot results of NLRP3 and ASC from BV2. The first time.

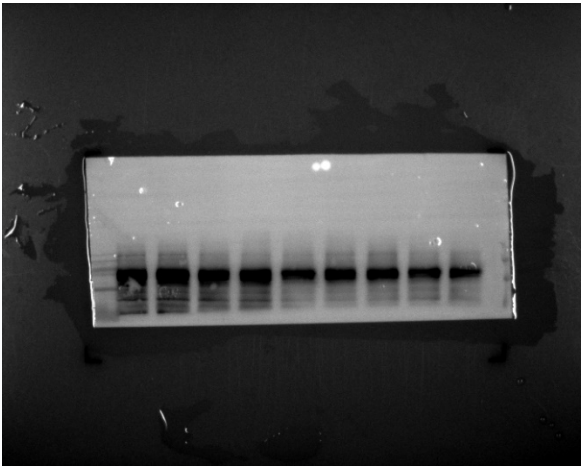

(NLRP3)

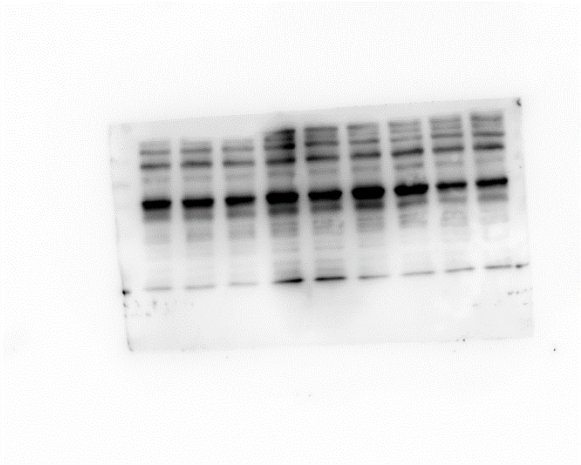

(ASC)

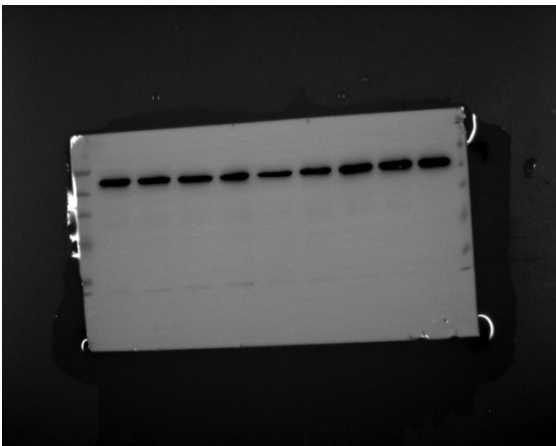

( $\beta$ -actin)

| NLRP3  | ASC    | $\beta$ -actin | Ratio of NLRP3 | Ratio of ASC | Group |
|--------|--------|----------------|----------------|--------------|-------|
| 211317 | 181009 | 189383         | 1.115818       | 0.955783     | SHAM  |
| 241657 | 187023 | 198921         | 1.214839       | 0.940187     | SHAM  |
| 217226 | 182478 | 196801         | 1.103785       | 0.927221     | SHAM  |

|        |        |        |          |          |      |
|--------|--------|--------|----------|----------|------|
| 228660 | 226170 | 186139 | 1.228437 | 1.21506  | DMSO |
| 203886 | 215707 | 158058 | 1.289944 | 1.364733 | DMSO |
| 207295 | 229780 | 176764 | 1.172722 | 1.299925 | DMSO |
| 201670 | 201169 | 227495 | 0.886481 | 0.884279 | NBP  |
| 189832 | 153177 | 234792 | 0.808511 | 0.652394 | NBP  |
| 174735 | 157748 | 223973 | 0.780161 | 0.704317 | NBP  |

The Western blot results of NLRP3 and ASC from BV2. The second time.

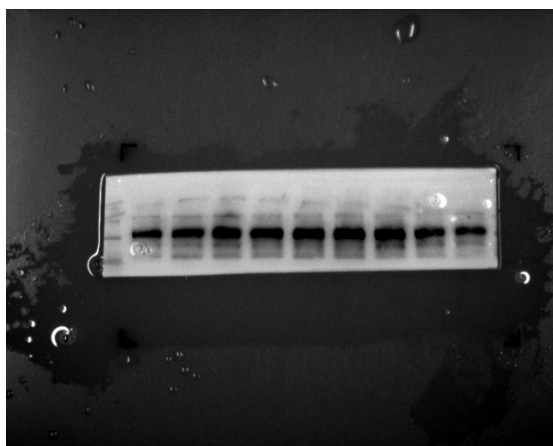

(NLRP3)

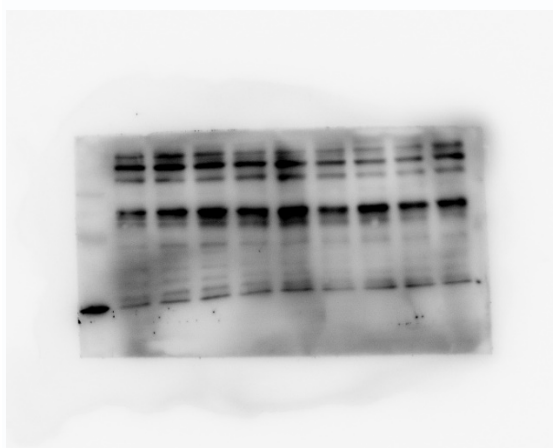

(ASC)

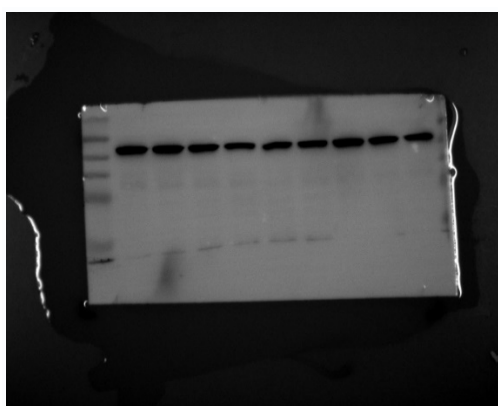

(β-actin)

| NLRP3  | ASC    | β-actin | Ratio of NLRP3 | Ratio of ASC | Group |
|--------|--------|---------|----------------|--------------|-------|
| 181653 | 131781 | 190873  | 0.951696       | 0.690412     | SHAM  |
| 215205 | 155746 | 191010  | 1.126669       | 0.815381     | SHAM  |
| 232245 | 167881 | 173485  | 1.338704       | 0.967697     | SHAM  |
| 235388 | 167962 | 138232  | 1.702847       | 1.215073     | DMSO  |
| 239363 | 179275 | 138330  | 1.730377       | 1.295995     | DMSO  |
| 239205 | 133934 | 143713  | 1.664463       | 0.931955     | DMSO  |
| 247638 | 157818 | 188026  | 1.317041       | 0.839341     | NBP   |
| 214068 | 136283 | 171503  | 1.248188       | 0.794639     | NBP   |
| 185876 | 147712 | 152813  | 1.216362       | 0.966619     | NBP   |

The Western blot results of NLRP3 and ASC from BV2. The third time.

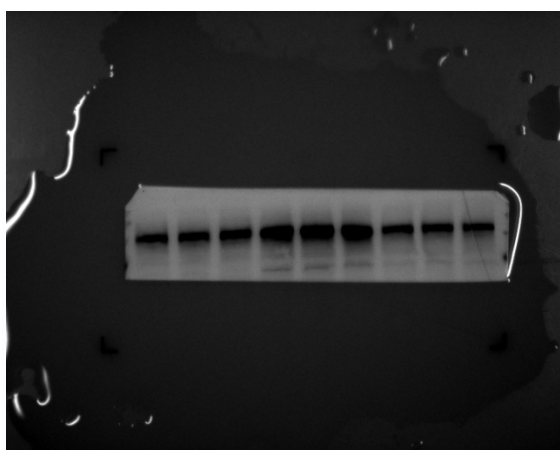

(NLRP3)



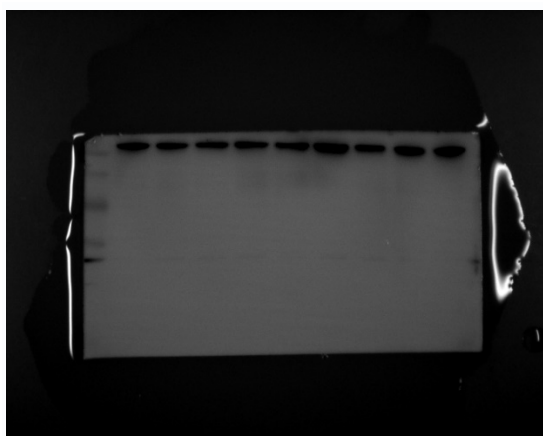

( $\beta$ -actin)

| NLRP3  | $\beta$ -actin | Ratio of NLRP3 | Group |
|--------|----------------|----------------|-------|
| 186584 | 178550         | 1.044996       | SHAM  |
| 196879 | 163638         | 1.203137       | SHAM  |
| 205608 | 163834         | 1.254978       | SHAM  |
| 247613 | 177074         | 1.398359       | DMSO  |
| 258660 | 187270         | 1.381214       | DMSO  |
| 246722 | 223382         | 1.104485       | DMSO  |
| 187945 | 178370         | 1.053681       | NBP   |
| 190528 | 191423         | 0.995324       | NBP   |
| 180700 | 193246         | 0.935078       | NBP   |

The Western blot results of NLRP3 and ASC from BV2. The fourth time.

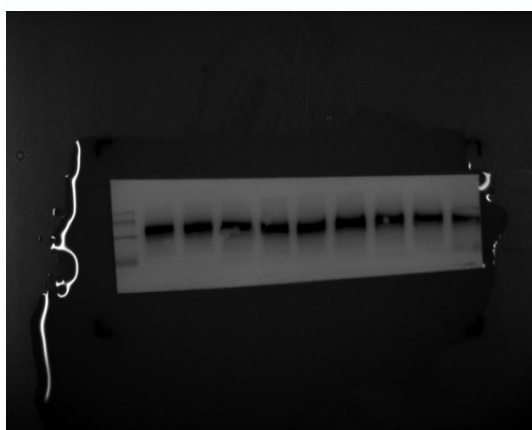

(NLRP3)

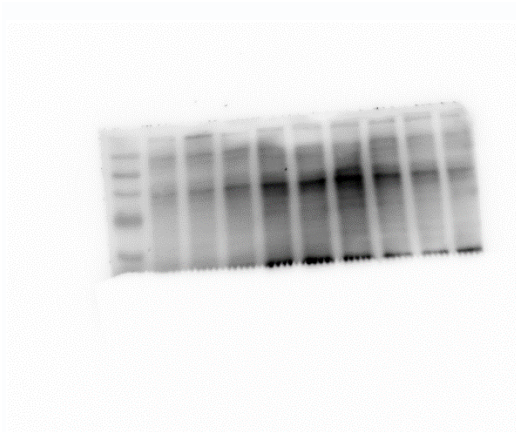

(ASC )

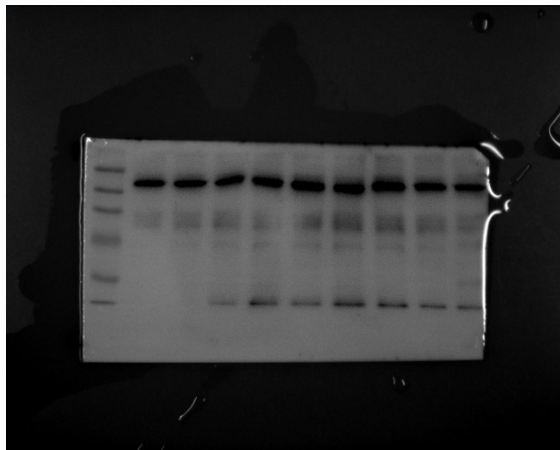

(actin)

| NLRP3  | ASC    | $\beta$ -actin | Ratio of NLRP3 | Ratio of ASC | Group |
|--------|--------|----------------|----------------|--------------|-------|
| 202719 | 69993  | 163749         | 1.237986       | 0.427441     | SHAM  |
| 213827 | 88350  | 181037         | 1.181123       | 0.488022     | SHAM  |
| 197053 | 111148 | 179017         | 1.10075        | 0.62088      | SHAM  |
| 207441 | 148370 | 197098         | 1.052476       | 0.752773     | DMSO  |
| 219704 | 158517 | 220379         | 0.996937       | 0.719293     | DMSO  |
| 234634 | 180038 | 220406         | 1.064554       | 0.816847     | DMSO  |
| 201426 | 146583 | 227133         | 0.88682        | 0.645362     | NBP   |
| 192567 | 105058 | 192811         | 0.998735       | 0.544876     | NBP   |
| 153373 | 78878  | 173095         | 0.886063       | 0.455692     | NBP   |

The WHOLE blot of NLRP3

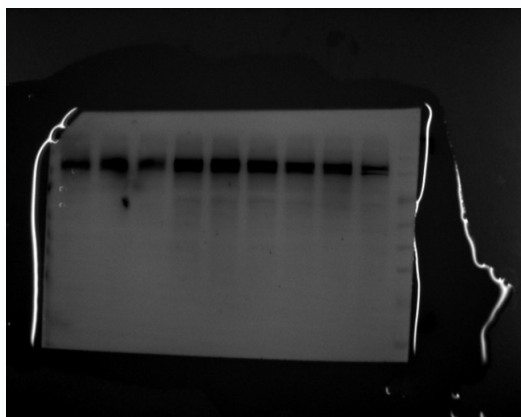

(NLRP3)

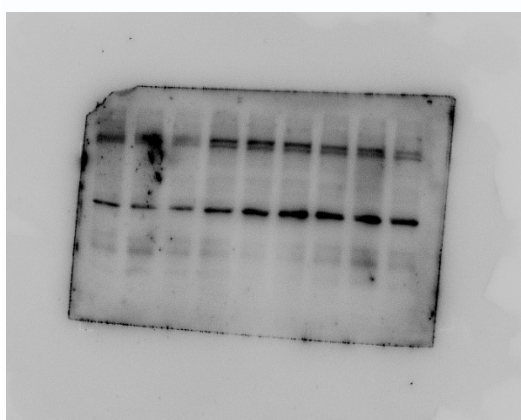

( $\beta$ -actin)

| NLRP3  | $\beta$ -actin | Ratio of NLRP3 | Group |
|--------|----------------|----------------|-------|
| 201654 | 195023         | 1.034001       | SHAM  |
| 227505 | 193667         | 1.174723       | SHAM  |
| 193979 | 174245         | 1.113254       | SHAM  |
| 239596 | 200142         | 1.19713        | DMSO  |
| 247479 | 211090         | 1.172386       | DMSO  |
| 238710 | 235006         | 1.015761       | DMSO  |
| 219569 | 225074         | 0.975541       | NBP   |
| 218933 | 235514         | 0.929597       | NBP   |
| 172273 | 214474         | 0.803235       | NBP   |
